# Supplementary material
Source: Springer Nature journal article supplement (https://www.springermedizin.de/resource/supplementary/12947_2012_434_MOESM1_ESM.pdf/9555738)
Supplement: MOESM1 [file 9555738]

**Additional file 1. Full list of measured and calculated parameters**

| Nr | Method                    | Parameter                                             | Abbreviation                                                                    | Dimension |
|----|---------------------------|-------------------------------------------------------|---------------------------------------------------------------------------------|-----------|
| 1  | PW-DMI: longitudinal axis | Peak systolic velocity Rest                           | $S'_{rest}$                                                                     | cm/s      |
| 2  |                           | Peak systolic velocity Stress                         | $S'_{stress}$                                                                   | cm/s      |
| 3  |                           | Peak systolic velocity (Stress - Rest)                | $S'_{stress} - S'_{rest}$                                                       | cm/s      |
| 4  |                           | Peak systolic velocity [(Stress - Rest)/Rest]         | $(S'_{stress} - S'_{rest})/S'_{rest}$                                           |           |
| 5  |                           | Time to peak systolic velocity Rest                   | T to $S'_{rest}$                                                                | ms        |
| 6  |                           | Time to peak systolic velocity Stress                 | T to $S'_{stress}$                                                              | ms        |
| 7  |                           | Time to peak systolic velocity (Stress - Rest)        | T to $S'_{stress}$ - T to $S'_{rest}$                                           | ms        |
| 8  |                           | Time to peak systolic velocity [(Stress - Rest)/Rest] | $(T \text{ to } S'_{stress} - T \text{ to } S'_{rest})/T \text{ to } S'_{rest}$ |           |
| 9  |                           | Peak post-systolic velocity Rest                      | $PS'_{rest}$                                                                    | cm/s      |
| 10 |                           | Peak post-systolic velocity Stress                    | $PS'_{stress}$                                                                  | cm/s      |
| 11 |                           | Peak post-systolic velocity (Stress - Rest)           | $PS'_{stress} - PS'_{rest}$                                                     | cm/s      |
| 12 |                           | Peak post-systolic velocity [(Stress - Rest)/Rest]    | $(PS'_{stress} - PS'_{rest})/PS'_{rest}$                                        |           |
| 13 |                           | Peak E' wave velocity Rest                            | $E'_{rest}$                                                                     | cm/s      |
| 14 |                           | Peak E' wave velocity Stress                          | $E'_{stress}$                                                                   | cm/s      |

|    |                           |                                                    |                                          |      |
|----|---------------------------|----------------------------------------------------|------------------------------------------|------|
| 15 |                           | Peak A' wave velocity Rest                         | $A'_{rest}$                              | cm/s |
| 16 |                           | Peak A' wave velocity Stress                       | $A'_{stress}$                            | cm/s |
| 17 |                           | E'/A' ratio Rest                                   | $E'/A'_{rest}$                           |      |
| 18 |                           | E'/A' ratio Stress                                 | $E'/A'_{stress}$                         |      |
| 19 | CC-DMI: longitudinal axis | Peak systolic velocity Rest                        | $S'_{rest}$                              | cm/s |
| 20 |                           | Peak systolic velocity Stress                      | $S'_{stress}$                            | cm/s |
| 21 |                           | Peak systolic velocity (Stress - Rest)             | $S'_{stress} - S'_{rest}$                | cm/s |
| 22 |                           | Peak systolic velocity [(Stress - Rest)/Rest]      | $(S'_{stress} - S'_{rest})/S'_{rest}$    |      |
| 23 |                           | Peak post-systolic velocity Rest                   | $PS'_{rest}$                             | cm/s |
| 24 |                           | Peak post-systolic velocity Stress                 | $PS'_{stress}$                           | cm/s |
| 25 |                           | Peak post-systolic velocity (Stress - Rest)        | $PS'_{stress} - PS'_{rest}$              | cm/s |
| 26 |                           | Peak post-systolic velocity [(Stress - Rest)/Rest] | $(PS'_{stress} - PS'_{rest})/PS'_{rest}$ |      |
| 27 |                           | Peak E' wave velocity Rest                         | $E'_{rest}$                              | cm/s |
| 28 |                           | Peak E' wave velocity Stress                       | $E'_{stress}$                            | cm/s |
| 29 |                           | Peak A' wave velocity Rest                         | $A'_{rest}$                              | cm/s |
| 30 |                           | Peak A' wave velocity Stress                       | $A'_{stress}$                            | cm/s |
| 31 |                           | E'/A' ratio Rest                                   | $E'/A'_{rest}$                           |      |

|    |  |                                                          |                                                                                    |    |
|----|--|----------------------------------------------------------|------------------------------------------------------------------------------------|----|
| 32 |  | E'/A' ratio Stress                                       | $E'/A'_{stress}$                                                                   |    |
| 33 |  | Peak systolic strain Rest                                | $SS_{rest}$                                                                        | %  |
| 34 |  | Peak systolic strain Stress                              | $SS_{stress}$                                                                      | %  |
| 35 |  | Peak systolic strain (Stress - Rest)                     | $SS_{stress} - SS_{rest}$                                                          | %  |
| 36 |  | Peak systolic strain [(Stress - Rest)/Rest]              | $(SS_{stress} - SS_{rest})/SS_{rest}$                                              |    |
| 37 |  | Peak post-systolic strain Rest                           | $PSS_{rest}$                                                                       | %  |
| 38 |  | Peak post-systolic strain Stress                         | $PSS_{stress}$                                                                     | %  |
| 39 |  | Peak post-systolic strain (Stress - Rest)                | $PSS_{stress} - PSS_{rest}$                                                        | %  |
| 40 |  | Peak post-systolic strain [(Stress - Rest)/Rest]         | $(PSS_{stress} - PSS_{rest})/PSS_{rest}$                                           |    |
| 41 |  | Time to peak post-systolic strain Rest                   | T to $PSS_{rest}$                                                                  | ms |
| 42 |  | Time to peak post-systolic strain Stress                 | T to $PSS_{stress}$                                                                | ms |
| 43 |  | Time to peak post-systolic strain (Stress - Rest)        | T to $PSS_{stress}$ - T to $PSS_{rest}$                                            | ms |
| 44 |  | Time to peak post-systolic strain [(Stress - Rest)/Rest] | $(T \text{ to } PSS_{stress} - T \text{ to } PSS_{rest})/T \text{ to } PSS_{rest}$ |    |
| 45 |  | Post-systolic index Rest                                 | $PSI_{rest}$                                                                       | %  |
| 46 |  | Post-systolic index Stress                               | $PSI_{stress}$                                                                     | %  |
| 47 |  | Post-systolic index (Stress - Rest)                      | $PSI_{stress} - PSI_{rest}$                                                        | %  |

|    |                        |                                                                  |                                             |          |
|----|------------------------|------------------------------------------------------------------|---------------------------------------------|----------|
| 48 |                        | Post-systolic index [(Stress - Rest)/Rest]                       | $(PSI_{stress} - PSI_{rest})/PSI_{rest}$    |          |
| 49 |                        | Ratio of post-systolic index to peak systolic strain Rest        | $PSI_{rest}/SS_{rest}$                      |          |
| 50 |                        | Ratio of post-systolic index to peak systolic strain Stress      | $PSI_{stress}/SS_{stress}$                  |          |
| 51 |                        | Ratio of post-systolic index to peak post-systolic strain Rest   | $PSI_{rest}/PSS_{rest}$                     |          |
| 52 |                        | Ratio of post-systolic index to peak post-systolic strain Stress | $PSI_{stress}/PSS_{stress}$                 |          |
| 53 |                        | Peak systolic strain rate Rest                                   | $SSR_{rest}$                                | $s^{-1}$ |
| 54 |                        | Peak systolic strain rate Stress                                 | $SSR_{stress}$                              | $s^{-1}$ |
| 55 |                        | Peak systolic strain rate (Stress - Rest)                        | $SSR_{stress} - SSR_{rest}$                 | $s^{-1}$ |
| 56 |                        | Peak systolic strain rate [(Stress - Rest)/Rest]                 | $(SSR_{stress} - SSR_{rest})/SSR_{rest}$    |          |
| 57 |                        | Peak post-systolic strain rate Rest                              | $PSSR_{rest}$                               | $s^{-1}$ |
| 58 |                        | Peak post-systolic strain rate Stress                            | $PSSR_{stress}$                             | $s^{-1}$ |
| 59 |                        | Peak post-systolic strain rate (Stress - Rest)                   | $PSSR_{stress} - PSSR_{rest}$               | $s^{-1}$ |
| 60 |                        | Peak post-systolic strain rate [(Stress - Rest)/Rest]            | $(PSSR_{stress} - PSSR_{rest})/PSSR_{rest}$ |          |
| 61 | STI: longitudinal axis | Peak systolic velocity Rest                                      | $S'_{rest}$                                 | cm/s     |
| 62 |                        | Peak systolic velocity Stress                                    | $S'_{stress}$                               | cm/s     |
| 63 |                        | Peak systolic velocity (Stress - Rest)                           | $S'_{stress} - S'_{rest}$                   | cm/s     |
| 64 |                        | Peak systolic velocity [(Stress - Rest)/Rest]                    | $(S'_{stress} - S'_{rest})/S'_{rest}$       |          |

|    |  |                                                    |                                          |      |
|----|--|----------------------------------------------------|------------------------------------------|------|
| 65 |  | Peak post-systolic velocity Rest                   | $PS'_{rest}$                             | cm/s |
| 66 |  | Peak post-systolic velocity Stress                 | $PS'_{stress}$                           | cm/s |
| 67 |  | Peak post-systolic velocity (Stress - Rest)        | $PS'_{stress} - PS'_{rest}$              | cm/s |
| 68 |  | Peak post-systolic velocity [(Stress - Rest)/Rest] | $(PS'_{stress} - PS'_{rest})/PS'_{rest}$ |      |
| 69 |  | Peak E' wave velocity Rest                         | $E'_{rest}$                              | cm/s |
| 70 |  | Peak E' wave velocity Stress                       | $E'_{stress}$                            | cm/s |
| 71 |  | Peak A' wave velocity Rest                         | $A'_{rest}$                              | cm/s |
| 72 |  | Peak A' wave velocity Stress                       | $A'_{stress}$                            | cm/s |
| 73 |  | E'/A' ratio Rest                                   | $E'/A'_{rest}$                           |      |
| 74 |  | E'/A' ratio Stress                                 | $E'/A'_{stress}$                         |      |
| 75 |  | Peak systolic strain Rest                          | $SS_{rest}$                              | %    |
| 76 |  | Peak systolic strain Stress                        | $SS_{stress}$                            | %    |
| 77 |  | Peak systolic strain (Stress - Rest)               | $SS_{stress} - SS_{rest}$                | %    |
| 78 |  | Peak systolic strain [(Stress - Rest)/Rest]        | $(SS_{stress} - SS_{rest})/SS_{rest}$    |      |
| 79 |  | Peak post-systolic strain Rest                     | $PSS_{rest}$                             | %    |
| 80 |  | Peak post-systolic strain Stress                   | $PSS_{stress}$                           | %    |
| 81 |  | Peak post-systolic strain (Stress - Rest)          | $PSS_{stress} - PSS_{rest}$              | %    |

|    |  |                                                                  |                                             |          |
|----|--|------------------------------------------------------------------|---------------------------------------------|----------|
| 82 |  | Peak post-systolic strain [(Stress - Rest)/Rest]                 | $(PSS_{stress} - PSS_{rest})/PSS_{rest}$    |          |
| 45 |  | Post-systolic index Rest                                         | $PSI_{rest}$                                | %        |
| 46 |  | Post-systolic index Stress                                       | $PSI_{stress}$                              | %        |
| 47 |  | Post-systolic index (Stress - Rest)                              | $PSI_{stress} - PSI_{rest}$                 | %        |
| 48 |  | Post-systolic index [(Stress - Rest)/Rest]                       | $(PSI_{stress} - PSI_{rest})/PSI_{rest}$    |          |
| 49 |  | Ratio of post-systolic index to peak systolic strain Rest        | $PSI_{rest}/SS_{rest}$                      |          |
| 50 |  | Ratio of post-systolic index to peak systolic strain Stress      | $PSI_{stress}/SS_{stress}$                  |          |
| 51 |  | Ratio of post-systolic index to peak post-systolic strain Rest   | $PSI_{rest}/PSS_{rest}$                     |          |
| 52 |  | Ratio of post-systolic index to peak post-systolic strain Stress | $PSI_{stress}/PSS_{stress}$                 |          |
| 83 |  | Peak systolic strain rate Rest                                   | $SSR_{rest}$                                | $s^{-1}$ |
| 84 |  | Peak systolic strain rate Stress                                 | $SSR_{stress}$                              | $s^{-1}$ |
| 85 |  | Peak systolic strain rate (Stress - Rest)                        | $SSR_{stress} - SSR_{rest}$                 | $s^{-1}$ |
| 86 |  | Peak systolic strain rate [(Stress - Rest)/Rest]                 | $(SSR_{stress} - SSR_{rest})/SSR_{rest}$    |          |
| 87 |  | Peak post-systolic strain rate Rest                              | $PSSR_{rest}$                               | $s^{-1}$ |
| 88 |  | Peak post-systolic strain rate Stress                            | $PSSR_{stress}$                             | $s^{-1}$ |
| 89 |  | Peak post-systolic strain rate (Stress - Rest)                   | $PSSR_{stress} - PSSR_{rest}$               | $s^{-1}$ |
| 90 |  | Peak post-systolic strain rate [(Stress - Rest)/Rest]            | $(PSSR_{stress} - PSSR_{rest})/PSSR_{rest}$ |          |

|    |                  |                                                              |                                                |          |
|----|------------------|--------------------------------------------------------------|------------------------------------------------|----------|
| 91 | STI: radial axis | Peak radial systolic strain rate Rest                        | $RSSR_{rest}$                                  | $s^{-1}$ |
| 92 |                  | Peak radial systolic strain rate Stress                      | $RSSR_{stress}$                                | $s^{-1}$ |
| 93 |                  | Peak radial systolic strain rate (Stress - Rest)             | $RSSR_{stress} - RSSR_{rest}$                  | $s^{-1}$ |
| 94 |                  | Peak radial systolic strain rate [(Stress - Rest)/Rest]      | $(RSSR_{stress} - RSSR_{rest})/RSSR_{rest}$    |          |
| 95 |                  | Peak radial post-systolic strain rate Rest                   | $RPSSR_{rest}$                                 | $s^{-1}$ |
| 96 |                  | Peak radial post-systolic strain rate Stress                 | $RPSSR_{stress}$                               | $s^{-1}$ |
| 97 |                  | Peak radial post-systolic strain rate (Stress - Rest)        | $RPSSR_{stress} - RPSSR_{rest}$                | $s^{-1}$ |
| 98 |                  | Peak radial post-systolic strain rate [(Stress - Rest)/Rest] | $(RPSSR_{stress} - RPSSR_{rest})/RPSSR_{rest}$ |          |
